# Supplementary material
Source: PubMed Central journal article supplement (PMC6748106)
Supplement: 41418_2018_188_MOESM1_ESM.pdf [file 41418_2018_188_MOESM1_ESM.pdf]

S1

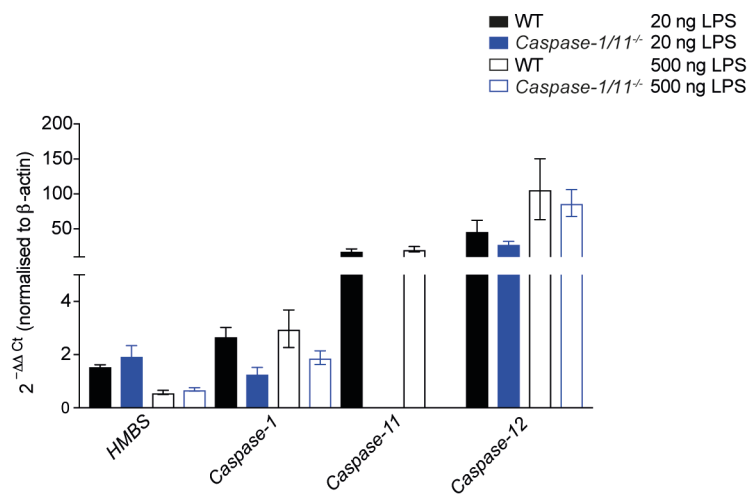

● WT  
 ▲ Caspase-1/11/12<sup>-/-</sup>

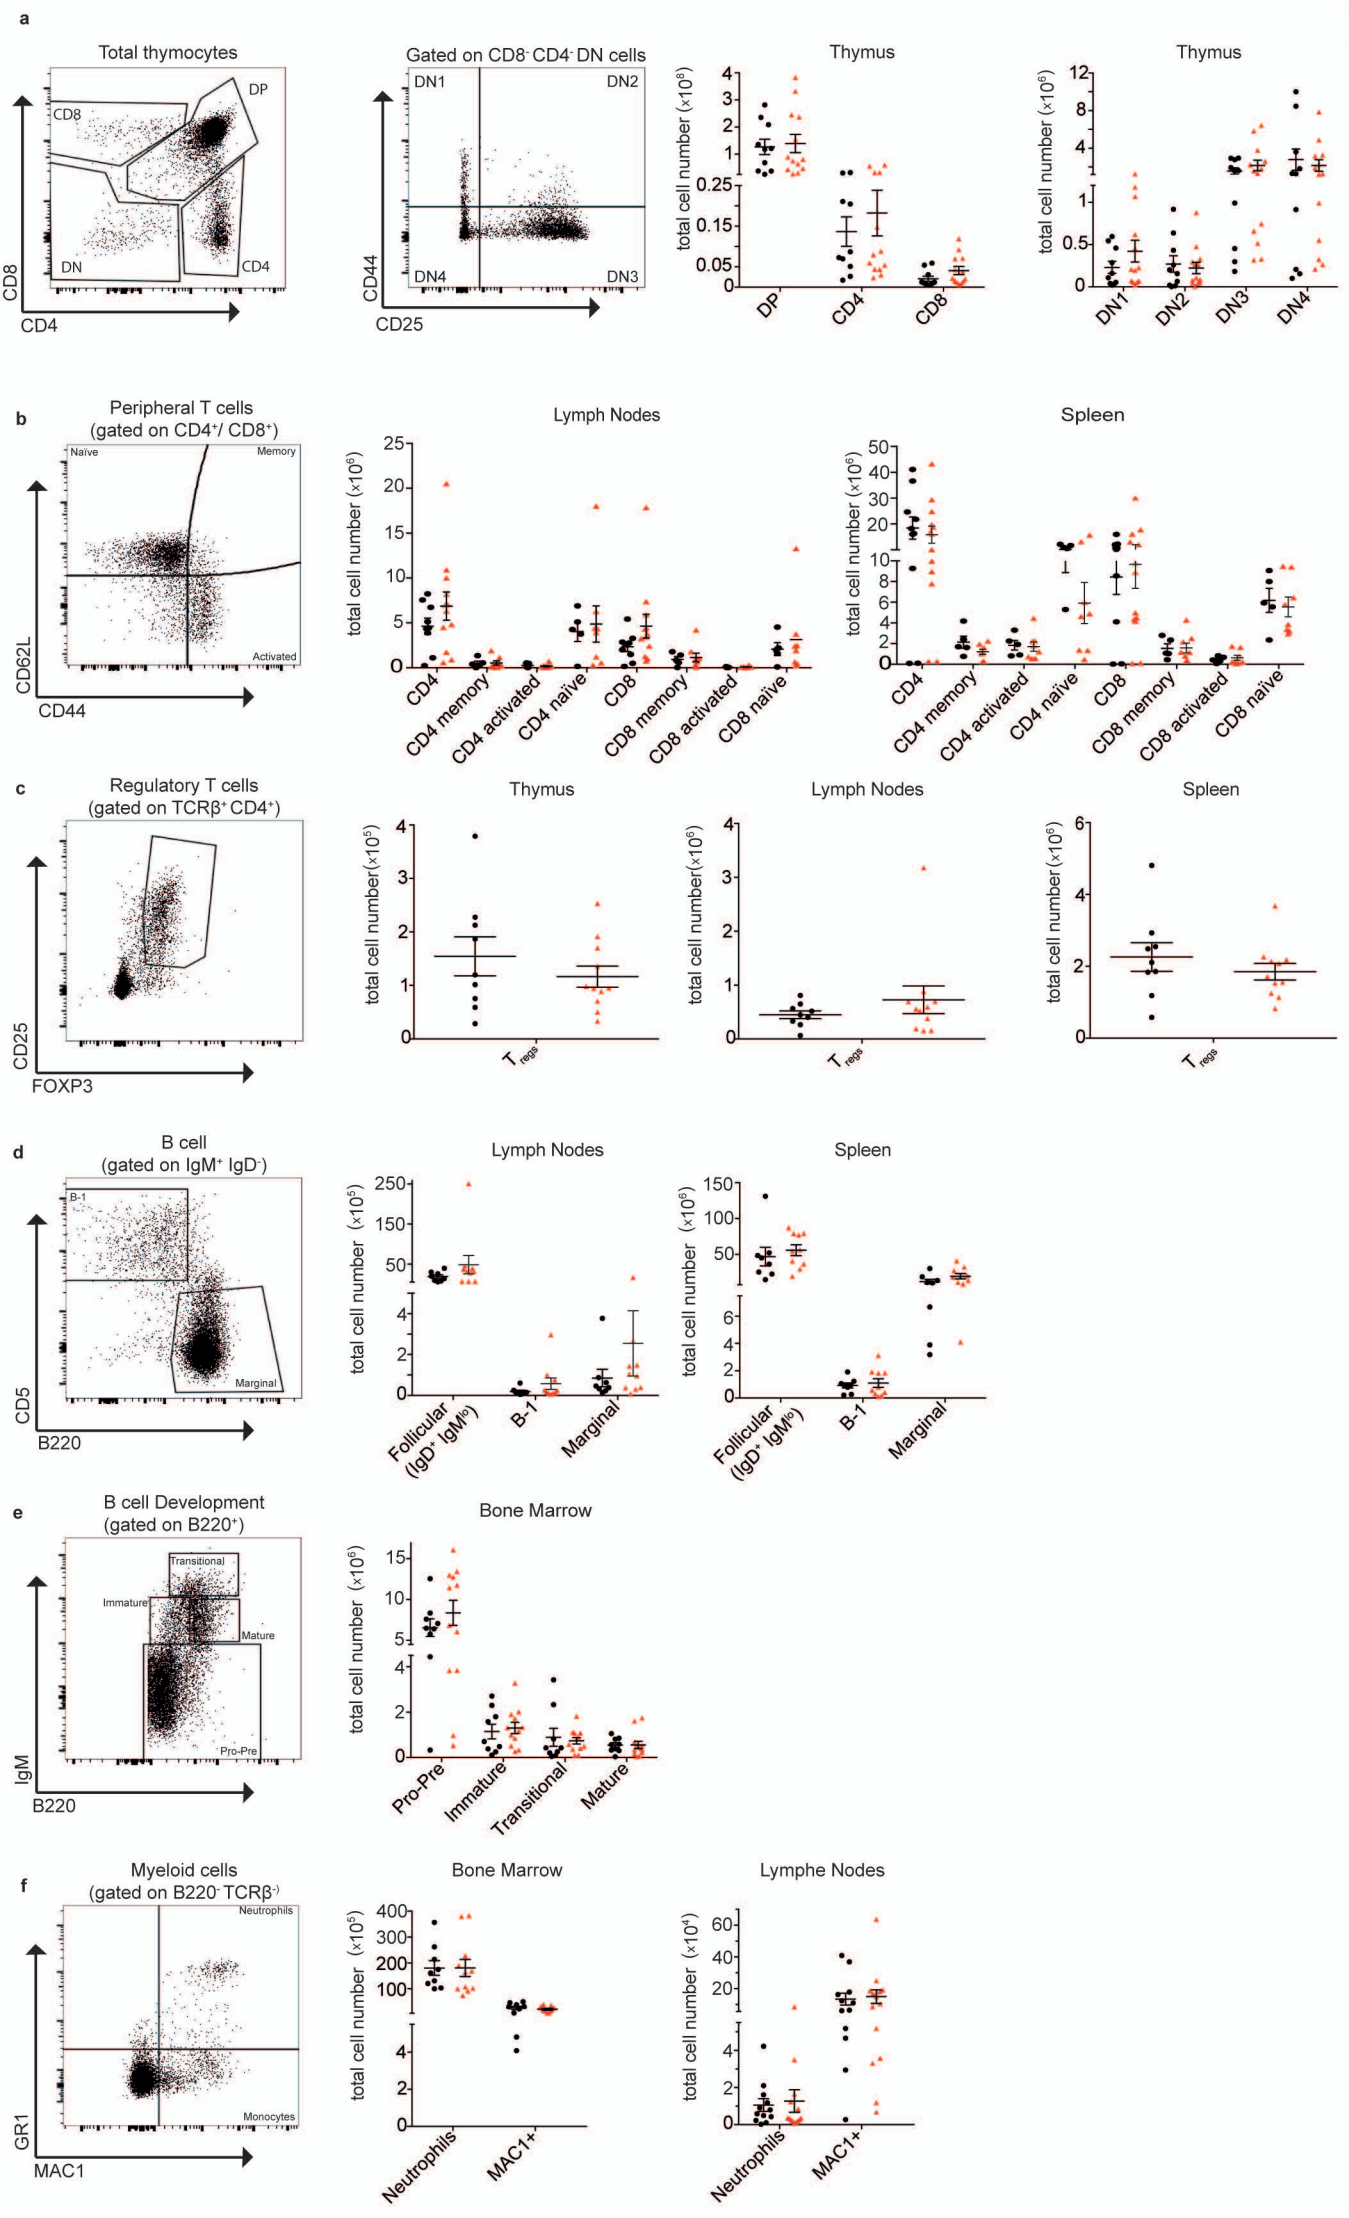

S3

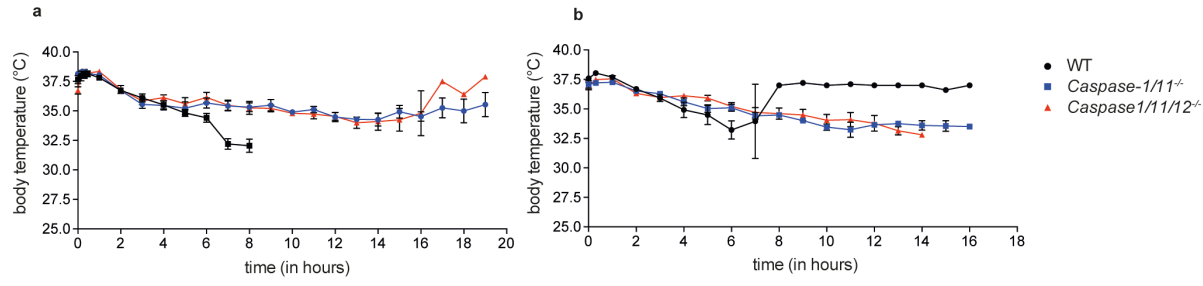

c

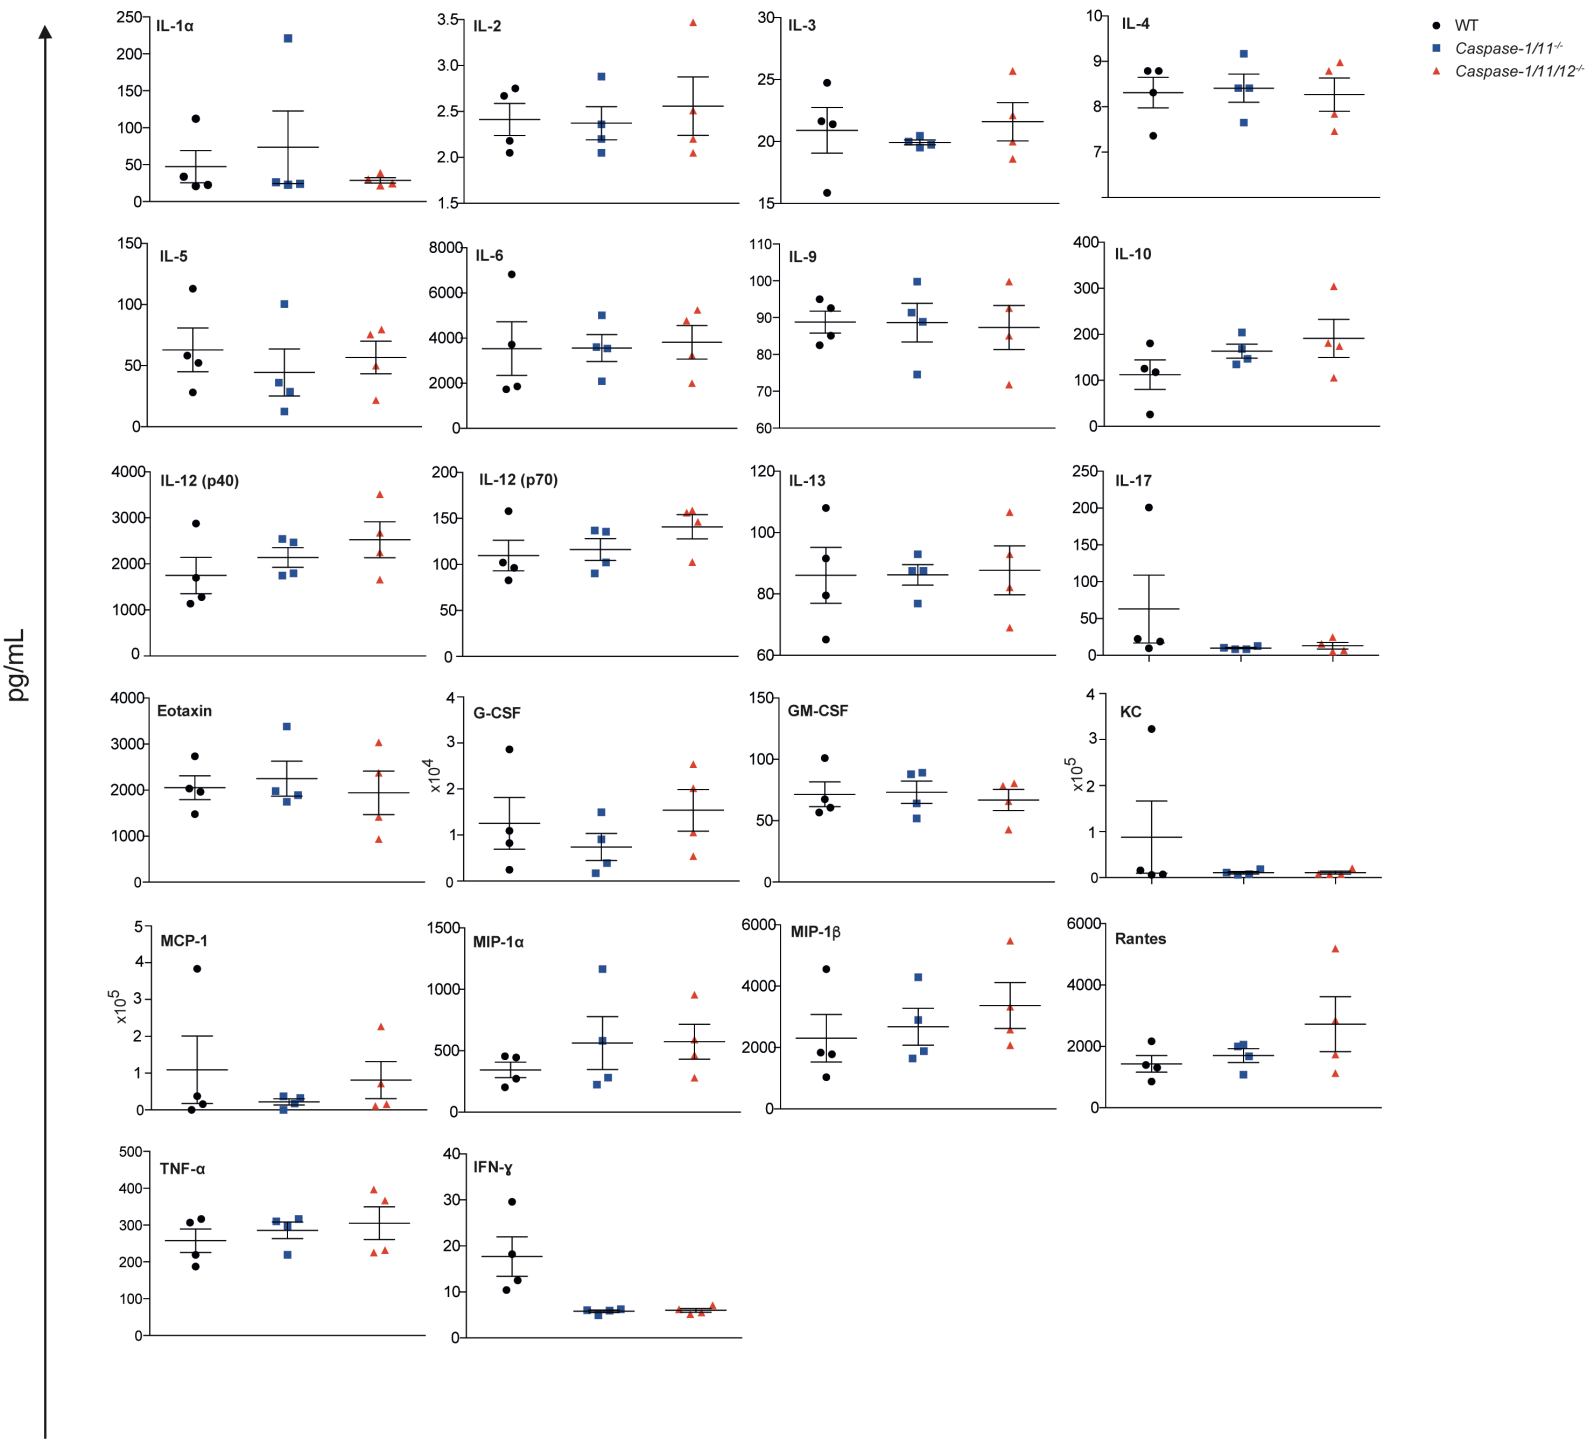

d

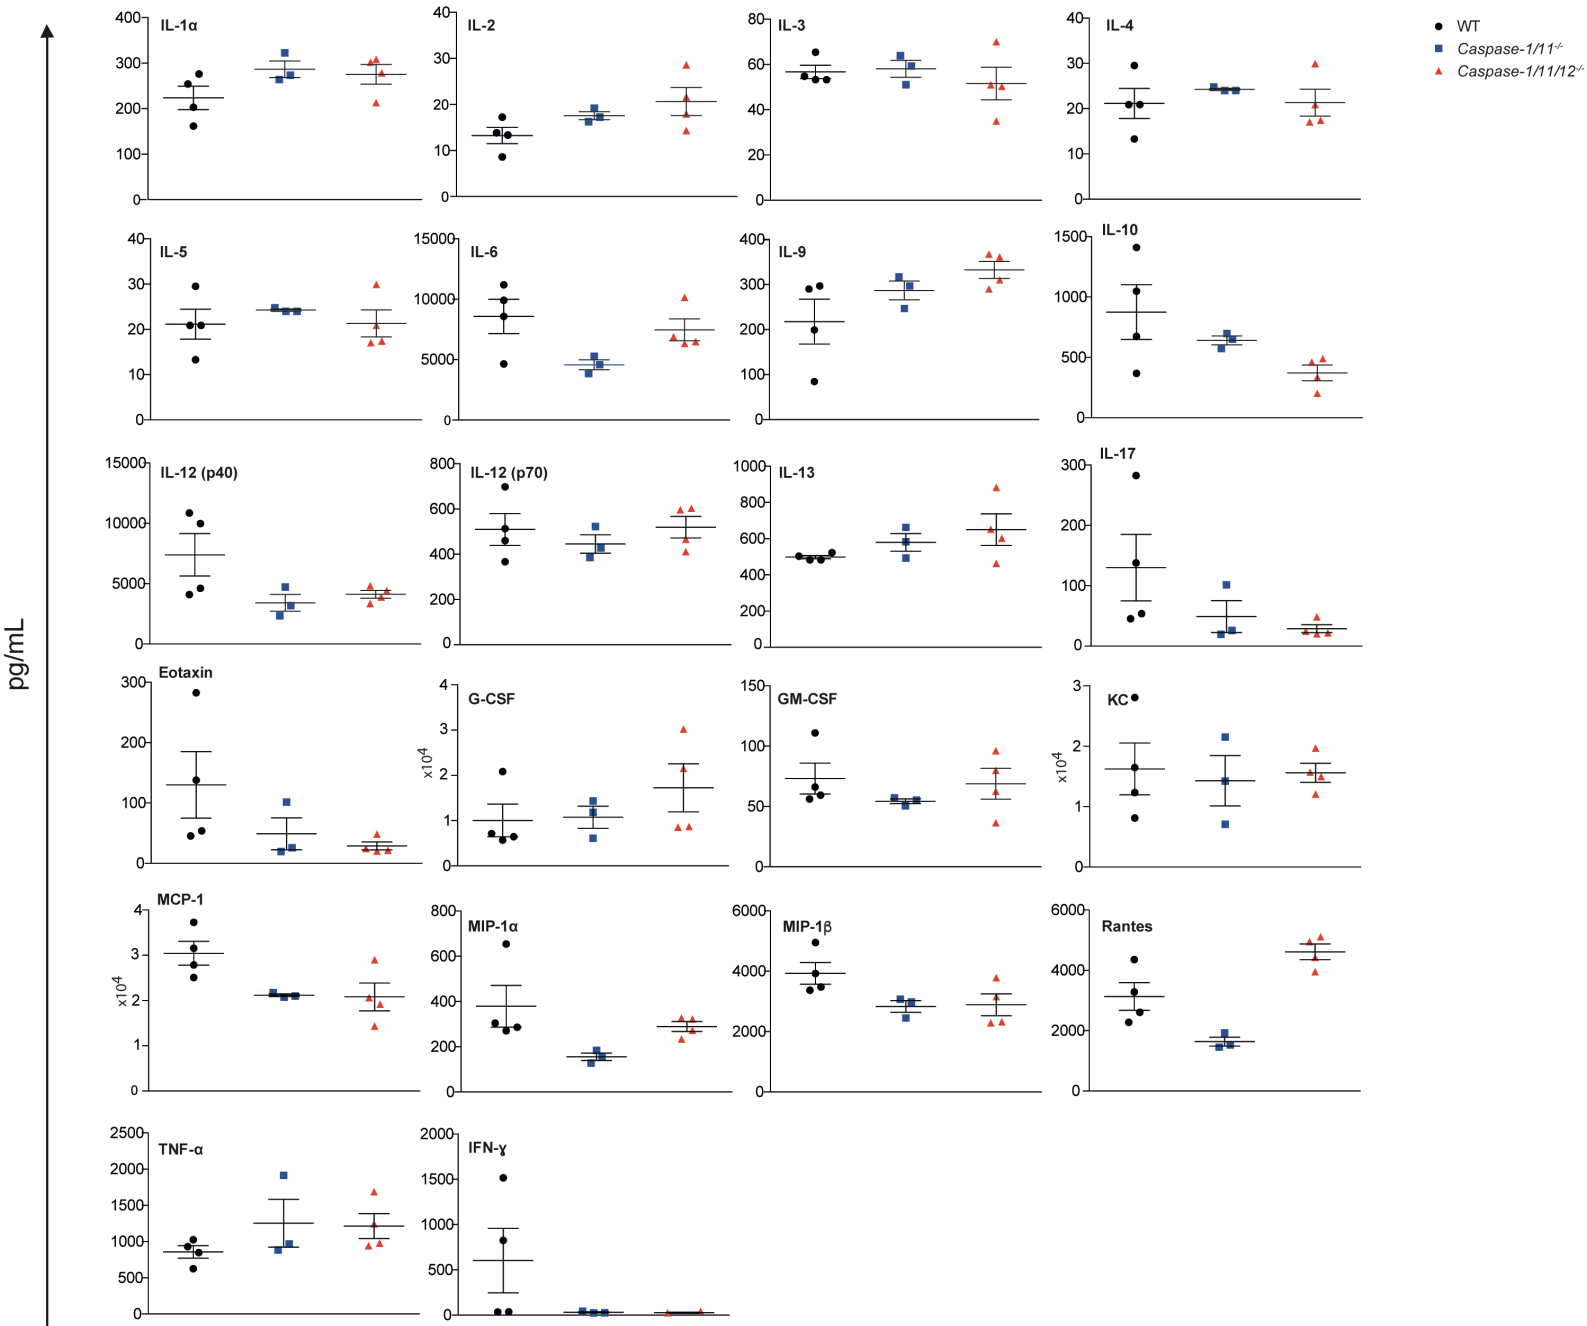

e

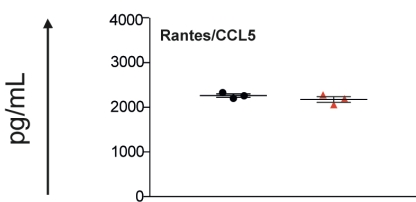

S4  
a

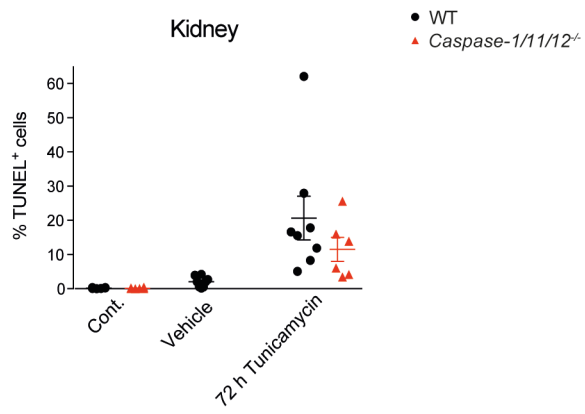

b

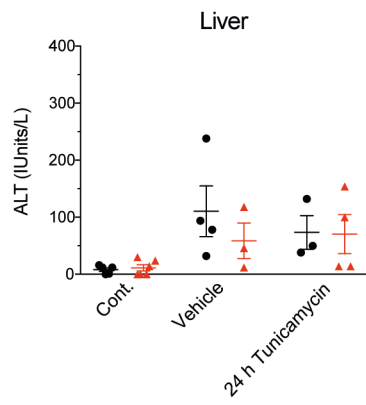

S5

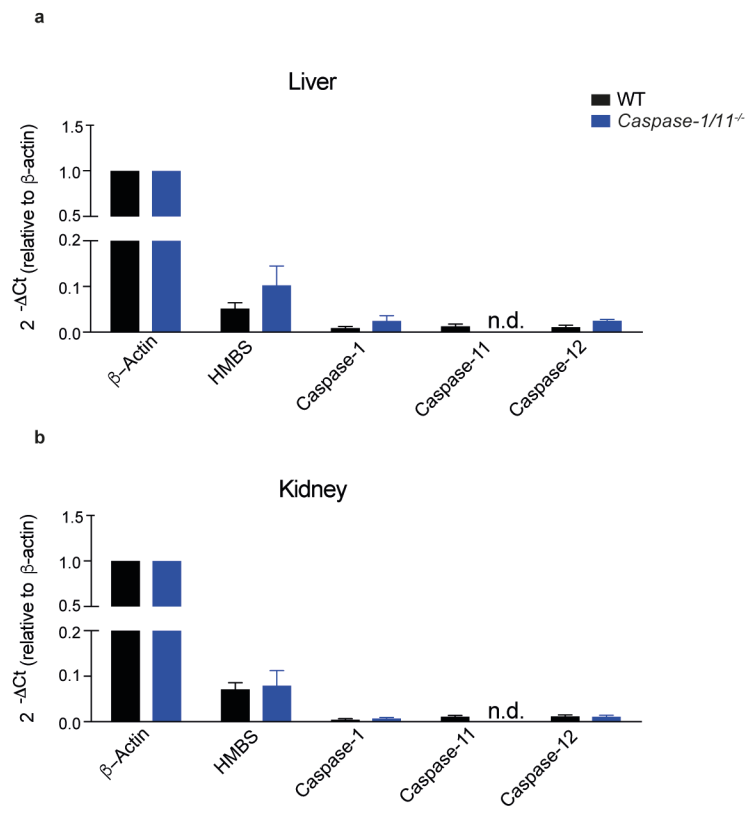

| <b>Table 1 a: Caspase-1 essay Il-1<math>\beta</math> secretion</b> |           |                   |
|--------------------------------------------------------------------|-----------|-------------------|
|                                                                    |           | adjusted p values |
| WT vs. C1/11-/-                                                    | Activated | 0.0001            |
| WT vs. C1/11/12 -/-                                                | Activated | 0.0002            |

| <b>Table 1 b: Caspase-11 essay Il-1<math>\beta</math> secretion</b> |           |                   |
|---------------------------------------------------------------------|-----------|-------------------|
|                                                                     |           | adjusted p values |
| WT vs. C1/11-/-                                                     | Activated | 0.001             |
| WT vs. C1/11/12 -/-                                                 | Activated | 0.001             |



| <b>Table 2 a: Survival statistics of mice post injection of 18 mg/kg</b> |                   |
|--------------------------------------------------------------------------|-------------------|
|                                                                          | adjusted p values |
| WT vs. C1/11 -/-                                                         | p=0.009           |
| WT vs. C1/11/12 -/-                                                      | p=0.001           |
| C1/11 -/- vs. C1/11/12 -/-                                               | p=0.1             |

| <b>Table 2 b: Il-18 secretion upon injection of 18 mg/kg</b> |                   |
|--------------------------------------------------------------|-------------------|
|                                                              | adjusted p values |
| Cont. WT vs. WT                                              | 0.002             |
| Cont. C1/11/12 -/- vs. WT                                    | 0.0002            |
| WT vs. C1/11 -/-                                             | <0.0001           |
| WT vs. C1/11/12 -/-                                          | <0.0001           |

| <b>Table 2 b: Survival statistics of mice post injection of 54 mg/kg</b> |                   |
|--------------------------------------------------------------------------|-------------------|
|                                                                          | adjusted p values |
| WT vs. C1/11 -/-                                                         | p=0.02            |
| WT vs. C1/11/12 -/-                                                      | p=0.02            |

| <b>Table 2 c: Il-18 secretion upon injection of 54 mg/kg</b> |                   |
|--------------------------------------------------------------|-------------------|
|                                                              | adjusted p values |
| Cont. WT vs. WT                                              | <0.0001           |
| Cont. C1/11/12 -/- vs. WT                                    | <0.0001           |
| WT vs. C1/11 -/-                                             | <0.0001           |
| WT vs. C1/11/12 -/-                                          | <0.0001           |

**Table 3:** Mean Ct values after indicated LPS treatment in BMDMs

|            | <b><i>β-actin</i></b> |                 | <b><i>HMBS</i></b> |                 | <b><i>Caspase-1</i></b> |                 | <b><i>Caspase-11</i></b> |                 | <b><i>Caspase-12</i></b> |                 |
|------------|-----------------------|-----------------|--------------------|-----------------|-------------------------|-----------------|--------------------------|-----------------|--------------------------|-----------------|
|            | WT                    | Caspase-1/11-/- | WT                 | Caspase-1/11-/- | WT                      | Caspase-1/11-/- | WT                       | Caspase-1/11-/- | WT                       | Caspase-1/11-/- |
| Untreated  | 16                    | 16.2            | 23.85              | 24.4            | 22.3                    | 22.5            | 24.8                     | 36.8            | 33.3                     | 32.8            |
| 20 ng LPS  | 16.4                  | 16.2            | 24.87              | 25.37           | 21.1                    | 22.3            | 21                       | 32.2            | 28.4                     | 28              |
| 500 ng LPS | 16.4                  | 17.1            | 25.21              | 26              | 21.1                    | 22.4            | 20.9                     | 34.9            | 27.3                     | 27.3            |

| <b>Table 4 a: INF-<math>\gamma</math> secretion, 18 mg/kg LPS I.P</b> |                   |
|-----------------------------------------------------------------------|-------------------|
|                                                                       | adjusted p values |
| WT vs. C1/11 -/-                                                      | 0.0206            |
| WT vs. C1/11/12 -/-                                                   | 0.0226            |

| <b>Table 4 b: Rantes/ CCL5 secretion, 54 mg/kg LPS I.P</b> |                   |
|------------------------------------------------------------|-------------------|
|                                                            | adjusted p values |
| WT vs. C1/11 -/-                                           | 0.0428            |
| WT vs. C1/11/12 -/-                                        | 0.0318            |
| C1/11 -/- vs. C1/11/12 -/-                                 | 0.0009            |

**Table 5:** Mean Ct expression values of *caspase-1*, *-11*, *-12* and  $\beta$ -*actin* in liver and kidney

|        | <b><i><math>\beta</math>-actin</i></b> |                 | <b><i>HMBS</i></b> |                 | <b><i>Caspase-1</i></b> |                 | <b><i>Caspase-11</i></b> |                 | <b><i>Caspase-12</i></b> |                 |
|--------|----------------------------------------|-----------------|--------------------|-----------------|-------------------------|-----------------|--------------------------|-----------------|--------------------------|-----------------|
|        | WT                                     | Caspase-1/11-/- | WT                 | Caspase-1/11-/- | WT                      | Caspase-1/11-/- | WT                       | Caspase-1/11-/- | WT                       | Caspase-1/11-/- |
| Liver  | 24.45                                  | 25.33           | 28.79              | 28.82           | 31.6                    | 30.93           | 30.9                     | n.d.            | 31.26                    | 30.66           |
| Kidney | 23.19                                  | 22.75           | 27.05              | 26.72           | 31.44                   | 29.98           | 29.96                    | n.d.            | 29.6                     | 29.27           |
